# Supplementary material for: Structure-based characterization of novel TRPV5 inhibitors
Source: eLife journal article supplement (doi:10.7554/elife.49572), 2019-10-24
Supplement: supp [file elife_poa_e49572_Figure_1_figure_supplement_5.docx]

**Figure 1-figure supplement 5**

| **2D Structure** | **ZINC ID** | **Other name (s)** | **N** | **Concentration** |
| --- | --- | --- | --- | --- |
| 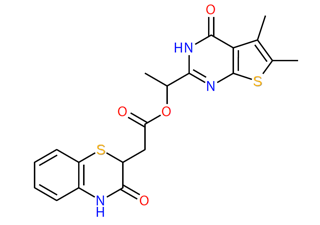 | ZINC09389941 | ZINC09389950 | 2 | 10 µM |
| 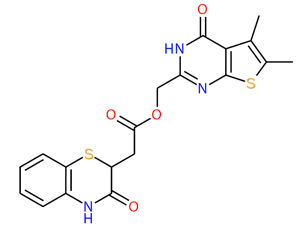 | ZINC25054165 | Z54077885, ZINC25054160 | 2 | 10 µM |
| 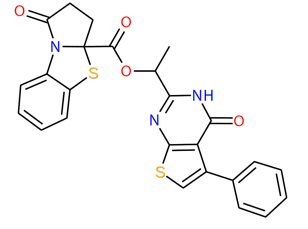 | ZINC09960474 | ZINC09960477 | 1 | 10 µM |
| 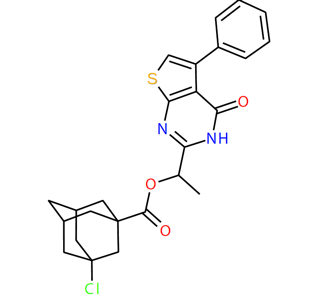 | ZINC13148573 | ZINC13148574 | 2 | 10 µM |
